# Supplementary material for: Speaking Up for Fundamental Care: the ILC Aalborg Statement
Source: PubMed Central journal article supplement — BMJ Open. 2019 Dec 9;9(12):e033077. doi: 10.1136/bmjopen-2019-033077 (PMC6924742; doi:10.1136/bmjopen-2019-033077), 2019-12-09
Supplement: bmjopen-2019-033077.draft_revisions.pdf [file bmjopen-2019-033077.draft_revisions.pdf]

# BMJ Open

BMJ Open is committed to open peer review. As part of this commitment we make the peer review history of every article we publish publicly available.

When an article is published we post the peer reviewers' comments and the authors' responses online. We also post the versions of the paper that were used during peer review. These are the versions that the peer review comments apply to.

The versions of the paper that follow are the versions that were submitted during the peer review process. They are not the versions of record or the final published versions. They should not be cited or distributed as the published version of this manuscript.

BMJ Open is an open access journal and the full, final, typeset and author-corrected version of record of the manuscript is available on our site with no access controls, subscription charges or pay-per-view fees (<http://bmjopen.bmj.com>).

If you have any questions on BMJ Open's open peer review process please email [info.bmjopen@bmj.com](mailto:info.bmjopen@bmj.com)

# BMJ Open

## Speaking Up for Fundamental Care: A Position Statement from the 2019 International Learning Collaborative (ILC) Meeting, Aalborg, Denmark

|                                 |                                                                                                                                                                                                                                                                                                                                                                                                                                                                                                                                                                                                                                                                                                                                                                                                                                                                                                                                                                                                                                                                                                                                                                                                                                                                                              |
|---------------------------------|----------------------------------------------------------------------------------------------------------------------------------------------------------------------------------------------------------------------------------------------------------------------------------------------------------------------------------------------------------------------------------------------------------------------------------------------------------------------------------------------------------------------------------------------------------------------------------------------------------------------------------------------------------------------------------------------------------------------------------------------------------------------------------------------------------------------------------------------------------------------------------------------------------------------------------------------------------------------------------------------------------------------------------------------------------------------------------------------------------------------------------------------------------------------------------------------------------------------------------------------------------------------------------------------|
| Journal:                        | <i>BMJ Open</i>                                                                                                                                                                                                                                                                                                                                                                                                                                                                                                                                                                                                                                                                                                                                                                                                                                                                                                                                                                                                                                                                                                                                                                                                                                                                              |
| Manuscript ID                   | bmjopen-2019-033077.R1                                                                                                                                                                                                                                                                                                                                                                                                                                                                                                                                                                                                                                                                                                                                                                                                                                                                                                                                                                                                                                                                                                                                                                                                                                                                       |
| Article Type:                   | Communication                                                                                                                                                                                                                                                                                                                                                                                                                                                                                                                                                                                                                                                                                                                                                                                                                                                                                                                                                                                                                                                                                                                                                                                                                                                                                |
| Date Submitted by the Author:   | 25-Jul-2019                                                                                                                                                                                                                                                                                                                                                                                                                                                                                                                                                                                                                                                                                                                                                                                                                                                                                                                                                                                                                                                                                                                                                                                                                                                                                  |
| Complete List of Authors:       | <p>Kitson, Alison; Flinders University, College of Nursing and Health Sciences<br/> Carr, Devin; Michigan Medicine, University Hospital and Frankel Cardiovascular Center<br/> Conroy, Tiffany ; Flinders University, College of Nursing and Health Sciences<br/> Feo, Rebecca; Flinders University, College of Nursing and Health Sciences<br/> Grønkjær, Mette; Aalborg University, Department of Clinical Medicine; Aalborg University Hospital, Clinical Nursing Research Unit<br/> Huisman-de Waal, Getty; Radboud Universiteit<br/> Jackson, Debra; University of Technology Sydney<br/> Jeffs, Lianne; Sinai Health System, Lunenfeld-Tananbaum Research Institute; University of Toronto, Lawrence S. Bloomberg Faculty of Nursing<br/> Merkley, Jane; Sinai Health System; University of Toronto, Lawrence S. Bloomberg Faculty of Nursing<br/> Muntlin Athlin, Åsa; Uppsala University; Uppsala University Hospital<br/> Parr, Jennifer; Counties Manukau District Health Board<br/> Richards, David; University of Exeter, Medical School<br/> Sørensen, Erik; Aalborg University Hospital, Clinical Nursing Research Unit; Aalborg University, Department of Clinical Medicine<br/> Wengström, Yvonne; Karolinska Institutet, Neurobiology Care Science and Society, Nursing</p> |
| <b>Primary Subject Heading</b>: | Nursing                                                                                                                                                                                                                                                                                                                                                                                                                                                                                                                                                                                                                                                                                                                                                                                                                                                                                                                                                                                                                                                                                                                                                                                                                                                                                      |
| Secondary Subject Heading:      | Nursing                                                                                                                                                                                                                                                                                                                                                                                                                                                                                                                                                                                                                                                                                                                                                                                                                                                                                                                                                                                                                                                                                                                                                                                                                                                                                      |
| Keywords:                       | Health & safety < HEALTH SERVICES ADMINISTRATION & MANAGEMENT, Quality in health care < HEALTH SERVICES ADMINISTRATION & MANAGEMENT, HEALTH SERVICES ADMINISTRATION & MANAGEMENT                                                                                                                                                                                                                                                                                                                                                                                                                                                                                                                                                                                                                                                                                                                                                                                                                                                                                                                                                                                                                                                                                                             |
|                                 |                                                                                                                                                                                                                                                                                                                                                                                                                                                                                                                                                                                                                                                                                                                                                                                                                                                                                                                                                                                                                                                                                                                                                                                                                                                                                              |

1  
2  
3  
4  
5  
6  
7  
8  
9  
10  
11  
12  
13  
14  
15  
16  
17  
18  
19  
20  
21  
22  
23  
24  
25  
26  
27  
28  
29  
30  
31  
32  
33  
34  
35  
36  
37  
38  
39  
40  
41  
42  
43  
44  
45  
46  
47  
48  
49  
50  
51  
52  
53  
54  
55  
56  
57  
58  
59  
60

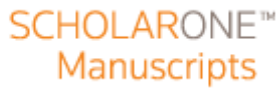

1  
2  
3 **Title page**  
4  
5  
6  
7

8 **Title:** Speaking Up for Fundamental Care: A Position Statement from the 2019 International Learning  
9  
10 Collaborative (ILC) Meeting, Aalborg, Denmark  
11  
12  
13

14 **Authors**  
15

16 Alison Kitson  
17

18 College of Nursing and Health Sciences, Flinders University, Adelaide, SA, Australia  
19  
20  
21

22  
23 Devin Carr  
24

25 University Hospital and Frankel Cardiovascular Center, Michigan Medicine, Ann Arbor, MI, US  
26  
27  
28

29  
30 Tiffany Conroy  
31

32 College of Nursing and Health Sciences, Flinders University, Adelaide, SA, Australia  
33  
34  
35

36  
37 Rebecca Feo  
38

39 College of Nursing and Health Sciences, Flinders University, Adelaide, SA, Australia  
40  
41  
42

43  
44 Mette Gronkjaer  
45

46 Department of Clinical Medicine, Aalborg University and Clinical Nursing Research Unit, Aalborg  
47  
48

49 University Hospital, Aalborg, Denmark  
50  
51

52  
53 Getty Huisman-de Waal  
54

55 Radboud University Medical Center, Radboud Institute for Health Sciences, IQ Healthcare, Nijmegen,  
56  
57

58 The Netherlands  
59  
60

1  
2  
3 Debra Jackson

4  
5 Faculty of Health, University of Technology, Sydney, Australia  
6  
7  
8

9  
10 Lianne Jeffs

11  
12 Lunenfeld-Tananbaum Research Institute, Sinai Health System, Toronto, Canada  
13  
14  
15

16 Jane Merkley

17  
18 Lunenfeld-Tananbaum Research Institute, Sinai Health System, Toronto, Canada  
19  
20  
21

22  
23 Åsa Muntlin Athlin

24  
25 Department of Emergency Care and Internal Medicine, Uppsala University Hospital, and Department  
26  
27 of Medical Sciences, Uppsala University, Uppsala, Sweden  
28  
29

30  
31  
32 Jenny Parr

33  
34 Manukau District Health Board, Auckland, New Zealand  
35  
36  
37  
38

39 David Richards

40  
41 College of Medicine and Health, University of Exeter, Exeter, UK  
42  
43  
44

45 Erik Sørensen

46  
47 Aalborg university and Aalborg University Hospital, Aalborg, Denmark  
48  
49  
50  
51

52 Yvonne Wengström

53  
54 Division of Neurobiology Care Science and Society, Nursing, Karolinska Institutet and  
55  
56 Radiumhemmet, Karolinska University Hospital, Stockholm, Sweden  
57  
58  
59  
60

1  
2  
3 **Corresponding author**  
4

5 Name: Alison Kitson  
6

7 Postal address: GPO Box 2100, Adelaide 5001, South Australia  
8

9  
10 Email: [alison.kitson@flinders.edu.au](mailto:alison.kitson@flinders.edu.au)  
11

12 Telephone: +61 8 82013492  
13  
14  
15  
16  
17

18  
19 **Keywords:** nursing care, health care quality, patient care  
20  
21  
22  
23  
24

25 **Word count (excluding title page, abstract and references):** 2436  
26  
27  
28  
29  
30  
31  
32  
33  
34  
35  
36  
37  
38  
39  
40  
41  
42  
43  
44  
45  
46  
47  
48  
49  
50  
51  
52  
53  
54  
55  
56  
57  
58  
59  
60

## Abstract

**Objective.** The International Learning Collaborative (ILC) is an organization dedicated to understanding why fundamental care fails to be provided in healthcare systems globally. At its 11th annual meeting in 2019, nursing leaders from 11 countries, together with patient representatives, confirmed that patients' fundamental care needs are still being ignored and nurses are still afraid to 'speak up' when these care failures occur. Whilst the ILC's efforts over the past decade have led to increased recognition of the importance of fundamental care, it is not enough. To generate practical and sustainable solutions to this wicked problem, we need to substantially rethink fundamental care and its contribution to patient outcomes and experiences, staff wellbeing, safety and quality, and the economic viability of our healthcare systems.

**Key arguments.** We present five propositions for radically transforming fundamental care delivery:

1. Value: Fundamental care must be foundational to all caring activities, systems and institutions
2. Talk: Fundamental care must be explicitly articulated in all caring activities, systems and institutions
3. Do: Fundamental care must be explicitly actioned and evaluated in all caring activities, systems and institutions
4. Own: Fundamental care must be owned by each individual who delivers care, who works in a system that is responsible for care or who works in an institution whose mission is to deliver care
5. Research: Fundamental care must undergo systematic and high-quality investigations to generate the evidence needed to inform care practices and shape health systems and education curricula

1  
2  
3 **Conclusion.** To achieve radical transformation within health systems globally, we must move beyond  
4 nursing and ensure all members of the healthcare team – educators, students, consumers, clinicians,  
5  
6 leaders, researchers, policy-makers, and politicians – value, talk, do, own and research fundamental  
7  
8 care. It is only through coordinated, collaborative effort that we will, and must, initiate and sustain  
9  
10  
11  
12 real change.  
13  
14  
15  
16  
17  
18  
19  
20  
21  
22  
23  
24  
25  
26  
27  
28  
29  
30  
31  
32  
33  
34  
35  
36  
37  
38  
39  
40  
41  
42  
43  
44  
45  
46  
47  
48  
49  
50  
51  
52  
53  
54  
55  
56  
57  
58  
59  
60

For peer review only



### **THE 'WICKED PROBLEM'**

One would think, with all the resources health systems continue to put into safety and quality initiatives; the implementation of more patient-centred care policies; and the proliferation of agencies to regulate and demand better fundamental care for patients (such as the Care Quality Commission in the UK), that the tide would be turning. However, this still does not seem to be the case, as illustrated by recent reports of continued poor practices.<sup>[1]</sup> A nurse turning away from a patient in a single episode of suffering is worrying in itself. However; when this action becomes the norm, when it is tolerated and even normalised within teams and institutions, it is necessary to reflect critically on why patients are treated in such dehumanising ways.<sup>[2]</sup>

The International Learning Collaborative (ILC) is an organisation set up to understand why fundamental care fails to be provided in our healthcare systems. At its 11<sup>th</sup> annual meeting in 2019, hosted by Aalborg University and Aalborg University Hospital in Denmark, nursing leaders from 11 countries, together with patient representatives, confirmed that fundamental care is still failing to be delivered consistently. Patients are still being ignored and 'commodified' and nurses are still afraid of 'speaking up' when fundamental care failures happen.

Personal experiences from nursing colleagues and patients outlining fundamental care breaches were all too readily available. One nurse recounted her story of being in an Emergency Department caring for a patient who needed a CT scan. The patient had to be moved to the X-ray department and then to a ward. Before this happened, he was incontinent of urine, soaking the bed and himself. The nurse went to find clean linen and pyjamas but was told by the nurse-in-charge that there was no time to do this as the department would fail its 4-hour discharge target if there was a delay. She ignored the instruction from the nurse-in-charge, instead meeting the patient's fundamental care needs, but was made to feel she had done something wrong. Another nurse told the story of her father-in-law who lost several kilos in weight over the course of a 10-day stay in hospital. He was

1  
2  
3 discharged frail, weak and vulnerable, with no guidance or support offered to the patient and family.  
4  
5 Even as a nurse she felt unable to challenge what was happening to him.  
6  
7  
8  
9

10 Patient representatives at the meeting confirmed that these types of dehumanising actions were  
11 familiar to them. One cancer survivor spoke about having survived but was traumatised by the  
12 experience of care. Another survivor recounted a conversation with a nurse who, when starting  
13 chemotherapy, said to the patient that if it had been her, she would not have agreed to the  
14 treatment. These stories resonated with nursing leaders attending the ILC meeting from Australia,  
15 New Zealand, Japan, Iceland, Norway, Sweden, Denmark, the Netherlands, Canada, the US, and the  
16 UK.  
17  
18  
19  
20  
21  
22  
23  
24  
25  
26  
27

28 This would seem to indicate that we continue to have a problem; not an isolated one, but one that  
29 has infected every health system globally. It would also seem that we cannot solve it by doing more  
30 of the same. We need to rethink fundamental care and its contribution to patient and staff  
31 wellbeing, patient safety and quality, and the economic viability of our healthcare systems.  
32  
33  
34  
35  
36  
37  
38

### 39 ***THE PROPOSED SOLUTION...***

40  
41 In addition to trying to understand the reasons for the fundamental care failures in our healthcare  
42 systems, at the ILC meeting we worked on finding different ways of addressing the issue, moving to  
43 practical and sustainable solutions. We identified five essential ingredients needed for this  
44 transformation. These are presented as five propositions:  
45  
46  
47  
48  
49

- 50 1. Value Fundamental Care: Fundamental care is foundational to all caring activities, systems  
51 and institutions  
52
- 53 2. Talk Fundamental Care: Fundamental care must be explicitly articulated in all caring  
54 activities, systems and institutions  
55  
56  
57  
58  
59  
60

3. Do Fundamental Care: Fundamental care must be explicitly actioned and evaluated in all caring activities, systems and institutions
4. Own Fundamental Care: Fundamental care must be owned by each individual who delivers care, who works in a system that is responsible for care or who works in an institution whose mission is to deliver care
5. Research Fundamental Care: Fundamental care must undergo systematic, high-quality investigations to generate the evidence needed to inform care practices and shape health systems and education curricula

### **1. Value Fundamental Care**

The ILC has been systematically developing definitions around fundamental care<sup>[3]</sup> and has developed an evidence-based framework<sup>[4, 5]</sup> to help nurses implement fundamental care in a more consistent way. The Fundamentals of Care Framework consists of three dimensions: nurse-patient relationship; integration of physical, psychosocial and relational elements of care; and consideration of the context where that care happens.<sup>[5]</sup>

Our argument is that regardless of clinical condition, age, acuity, complexity, or care setting, every patient will require their fundamental care needs to be assessed and met for them to be safe and to recover optimally. Current failures in our health systems, including the poor level of remuneration for nurses delivering fundamental care, are directly related to the lack of value placed on fundamental care as a foundational cornerstone to safety and quality.

Our proposal is that if executive boards and shareholders in caring and healthcare businesses recognised and acknowledged the importance of fundamental care to their financial success, then appropriate systems and processes would be put in place, and would be more effective and efficient, leading to improved patient outcomes and better staff satisfaction.

## 2. Talk Fundamental Care

Only after executive leaders and shareholders understand the value of delivering fundamental care consistently to all patients (customers) will the language of fundamental care be more readily accepted and understood. Commonly, nursing care patient notes are regarded as ‘fluffy notes’, rarely referred to by other members of the healthcare team. The ‘knowledge hierarchy’ cascades from the medical to allied health notes and finally to nursing notes (where some aspects of patients’ fundamental care needs are recorded). Consequently, nursing activities tend to relate to risk assessments, safety reports or concerns over clinical/medical activity.

This reality carries with it profound risks both to patients and nurses. When nothing or very little about fundamental care is documented in patients’ records then it is impossible to tell what has been provided and what has not. Electronic patient records do not solve this problem as they have been constructed within the medical hierarchy, hence fundamental care is still invisible.

Our argument is that by using the core elements of the Fundamentals of Care Framework (relationship, integration of care and context), we can generate consistent and meaningful summaries of patients’ fundamental care needs. By investing in infrastructure and workflow systems that comprehensively record patients’ fundamental care needs we will be able to document what interventions were undertaken and what impact they had. Then we will be able to teach fundamental care more consistently, addressing the ‘theory-practice’ gap that still exists.<sup>[6]</sup>

Our proposal is to extend the complex mapping work needed to generate consistent terminology around fundamental care and how it is documented, and to invite interdisciplinary colleagues, managers and educators to engage in this dialogue.

### 3. Do Fundamental Care

Having fundamental care valued by organisations and having done the work around conceptual frameworks, terminology and education, we then need to commit to making fundamental care happen in a consistent, safe, person-centred way for all patients, independent of care setting. This will require a significant shift in culture for many nurses (and every other member of the care team). Traditionally, nurses have been rewarded for the speed with which they can accomplish multiple tasks within rigid timeframes. This 'task and time' mentality is the antithesis to the values of fundamental care delivery based on relationship and integration.<sup>[5]</sup> How whole nursing teams (and consequently interdisciplinary care teams) must re-design their fundamental care delivery systems will be a huge transformational activity. It will require re-design teams to work collaboratively with nurses, patients and other key stakeholders to turn fundamental caring systems and processes 'up-side-down.' It will also require the development of standardised ways of measuring fundamental care that are embedded in patient records and can inform risk assessments, safety, quality and outcome metrics.<sup>[7]</sup>

Our argument is that because the 'task and time' culture is so deeply embedded in nursing and healthcare culture, there needs to be a paradigm shift in work processes related to fundamental care delivery. We must move from a 'task and time' mentality to a 'thinking and linking' mental model, where registered nurses are able to integrate and coordinate patients' fundamental care with their other care needs across their healthcare experience.<sup>[8]</sup>

Our proposal is to call for collaborating healthcare organisations and universities to work with the ILC to systematically and rigorously undertake this transformation, generating evidence of impact through cultural change and the development of appropriate measures as we work together to improve patients' fundamental care experiences.

#### 4. Own Fundamental Care

We have to ask ourselves what would healthcare organisations look like if we put fundamental care at the centre of all that we do. Certainly, there are flagship institutions where patients are satisfied with their care, where nurses feel happy and fulfilled in their caring roles and where medical and quality-of-life outcomes are exemplary. However, these are the exception rather than the rule and we need urgently to own the agenda to make fundamental care more visible in our health systems. There are many practical things we can do such as ensuring fundamental care stories (good and bad) are presented to executive board members and to local and national politicians; having fundamental care elements explicitly embedded in policies, safety and quality standards, educational standards and research tenders; and making sure that nursing leaders globally speak up for fundamental care.

Yet, we know that in many countries, nursing is facing severe shortages. Nurses are leaving the profession, citing burn out and stress as reasons<sup>[9]</sup> Many talk about the disappointment and disillusionment of wanting to care for patients in an holistic way but being unable to do this in the systems in which they work. Increasingly, international research is identifying that what nurses prioritise is technical care over fundamental care, which leads to missed care<sup>[10, 11]</sup> or, worst case scenario, patient neglect or harm.<sup>[12]</sup>

However, workforce shortages cannot be an excuse for failure to address fundamental care needs. Neither can the mantra of busyness. Fundamental care is core to nursing values and nursing work. Nurses should not be 'too busy' to deliver it. Devaluing fundamental care and its importance devalues nursing and its importance. The notion that core nursing work can be performed by cadres of lower-educated care assistants is only burying the problem. This might solve a workforce shortage but it will increase the risk of harm to our patients. Our recent ILC meeting reflected the concern that patients also have with these issues. As stated by one of the patient representatives at the

1  
2  
3 meeting: more nurses are not the only answer – there needs to be a total redesign of how  
4  
5 fundamental care is valued in the system.<sup>[see also 1]</sup>  
6  
7  
8  
9

## 10 **5. Research Fundamental Care**

11  
12 Recent reports have identified poor fundamental care practices with care being standardised and  
13  
14 patients being objectified (see Journal of Clinical Nursing Special Issue on *Fundamental Care: The*  
15  
16 *Last Evidence-free Zone*, 2018, <https://onlinelibrary.wiley.com/toc/13652702/2018/27/11-12>).

17  
18 Fundamental care tends to be devalued, and the delivery of safe, person-centred care is challenged.  
19  
20 Although studies have stressed that nursing care is important for patient safety, recovery and  
21  
22 positive patient experiences,<sup>[13, 14]</sup> there is a pressing need to generate studies that demonstrate the  
23  
24 effects and benefits of fundamental care in order to strengthen the evidence base. For example, in a  
25  
26 recent systematic review,<sup>[15]</sup> the authors note in their quality appraisal of 149 experimental studies  
27  
28 into nursing care for nutrition, hygiene, toileting and mobility, that all but 13 studies had significant  
29  
30 biases and only one had clear practice implications for delivering fundamental care in routine  
31  
32 nursing care environments.  
33  
34  
35  
36  
37  
38

39 We also need systematically to evaluate the re-design of care delivery systems that put the patient  
40  
41 and their fundamental care needs at the centre. We need sound economic evaluation of the  
42  
43 investment required and off set that with improvements in health outcomes, throughput, and safety  
44  
45 and quality indicators. We need to research how we teach fundamental care to our nursing  
46  
47 students<sup>[16-20]</sup> and we need to understand how fundamental care is embedded in our policies and  
48  
49 legislation at national and local levels.<sup>[21]</sup>  
50  
51  
52  
53

54 Our argument is that the current problems healthcare systems are facing could be solved by more  
55  
56 investment in research programs that investigate how to deliver high-quality fundamental care in  
57  
58 multiple contexts and how to embed this evidence into future nursing (and other) healthcare  
59  
60

1  
2  
3 curricula. There are some exemplars of this, including the Basic Care Revisited research program in  
4 the Netherlands,<sup>[22]</sup> the fundamental care theme of the National Institute for Health Research's  
5  
6 Collaboration for Leadership in Applied Health Research and Care Wessex,<sup>[23]</sup> and the pioneering work  
7  
8 of ILC members (see Journal of Clinical Nursing Special Issue), but this work needs to be scaled up  
9  
10 and coordinated in a way that will start to offer solutions to healthcare systems sooner rather than  
11  
12 later. We must stop wasting tax payers' money in every country by thinking fundamental care  
13  
14 failures can be fixed by (at best) naive or (at worst) knee-jerk policy initiatives that do not address  
15  
16 the underlying problems.  
17  
18  
19  
20  
21  
22

23 Our proposal is to work with national governments, national and international nursing associations,  
24  
25 healthcare organisations, research funding bodies and universities to generate a collaborative  
26  
27 research and implementation program on fundamental care.  
28  
29  
30  
31

### 32 **THE CALL TO ACTION**

33  
34 We need to recognise the profoundly complex nature of the challenge facing all healthcare systems  
35  
36 globally. We need to acknowledge that how we are trying to fix the problem is not working and we  
37  
38 need to think differently. We need a call to action that connects the valuing, talking, doing, owning  
39  
40 and researching of fundamental care.  
41  
42  
43  
44

45 Whilst the ILC has grown in recent years, now totalling more than 200 members from 21 countries,  
46  
47 and making significant inroads, it is clear we cannot do it alone. And whilst other commentators  
48  
49 have identified the need for action around 'reconciliation, refocus and research'<sup>[1, p.151]</sup> on  
50  
51 fundamental care, we need a more concerted, explicit approach.  
52  
53  
54

55  
56 For the Call to Action to work we must move beyond nursing and involve all members of the  
57  
58 healthcare team: educators; students; consumers; clinicians; executives, managers and leaders;  
59  
60



1  
2  
3 researchers; policy-makers; the general public and politicians. We must all work together to initiate  
4  
5 and sustain real change and must do so in a coordinated, collaborative way.  
6  
7  
8  
9

10 Our proposal therefore is precisely the Call to Action for Fundamental Care.  
11  
12  
13

14 If you want to Value, Talk, Do, Own and Research Fundamental Care, please contact us at

15 [intlearningcollaborative@gmail.com](mailto:intlearningcollaborative@gmail.com) or <https://intlearningcollab.org/>  
16  
17  
18  
19  
20

### 21 **Contributorship statement**

22  
23 AK, DC, TC, RF, MG, GH, DJ, JP, ES and YW all made substantial contributions to the conception and  
24  
25 design of the manuscript and its central argument during the ILC 2019 meeting.  
26  
27

28 AK drafted the initial manuscript.  
29

30 AK, DC, RF, MG, GH, DJ, LJ, JM, AMA, DR, ES and YW all contributed to drafting of the manuscript and  
31  
32 critical revision of its intellectual content.  
33  
34

35 AK, DC, TC, RF, MG, GH, DJ, LJ, JM, AMA, JP, DR, ES and YW all approved the manuscript for  
36  
37 publication and agreed to be accountable for all aspects of the work, including ensuring that  
38  
39 questions related to the accuracy or integrity of any part of the work are appropriately investigated  
40  
41 and resolved.  
42  
43  
44

### 45 **Competing interests**

46  
47 None declared  
48  
49  
50  
51

### 52 **Funding**

53  
54 The authors have not declared a specific grant for this research from any funding agency in the  
55  
56 public, commercial or not-for-profit sectors.  
57  
58  
59  
60

## References

1. Richards DA, Borglin G. 'Shitty nursing' – The new normal? *Int J Nurs Stud*2019;91:148-52.
2. Hutchinson M, Jackson D. Troubling fragments and small stories: An analysis of public commentary on nursing through a web blog. *Collegian*2014;21:81-8.
3. Feo R, Conroy T, Jangland E, et al. Towards a standardised definition for fundamental care: A modified Delphi study. *J Clin Nurs*2018;27:2285-99.
4. Feo R, Conroy T, Alderman J, et al. Implementing fundamental care in clinical practice. *Nurs Stand*2017;31:52-62.
5. Kitson A, Conroy T, Kuluski K, et al. 2013. Reclaiming and redefining the Fundamentals of Care: Nursing's response to meeting patients' basic human needs. Adelaide, South Australia: School of Nursing, The University of Adelaide.
6. MacMillan K. The hidden curriculum: What are we actually teaching about the fundamentals of care? *Can J Nurs Leadersh*2016;26:37-46.
7. Jeffs L, Muntlin Athlin A, Needleman J, et al. Building the foundation to generate a fundamental care standardised data set. *J Clin Nurs*2018;27:2481-8.
8. Kitson A, Muntlin Athlin Å, Conroy T. Anything but Basic: Nursing's Challenge in Meeting Patients' Fundamental Care Needs. *J Nurs Scholarsh*2014;46:331-9.
9. Sasso L, Bagnasco A, Catania G, et al. Push and pull factors of nurses' intention to leave. *J Nurs Manage*2019;27:946-54.
10. Mandal L, Seethalakshmi A. Experience of prioritizing in nursing care in India: A qualitative study. *Indian Journal of Public Health Research and Development*2019;10:103-7.
11. Jones TL, Hamilton P, Murry N. Unfinished nursing care, missed care, and implicitly rationed care: State of the science review. *Int J Nurs Stud*2015;52:1121-37.
12. Gillespie A, Reader TW. Patient-Centered Insights: Using Health Care Complaints to Reveal Hot Spots and Blind Spots in Quality and Safety. *Milbank Q*2018;96:530-67.

13. Griffiths P, Maruotti A, Recio Saucedo A, et al. Nurse staffing, nursing assistants and hospital mortality: Retrospective longitudinal cohort study. *BMJ Qual Saf*2018;28:609-17.
14. Aiken LH, Sloane D, Griffiths P, et al. Nursing skill mix in European hospitals: Cross-sectional study of the association with mortality, patient ratings, and quality of care. *BMJ Qual Saf*2017;26:559-68.
15. Richards DA, Hilli A, Pentecost C, et al. Fundamental nursing care: A systematic review of the evidence on the effect of nursing care interventions for nutrition, elimination, mobility and hygiene. *J Clin Nurs*2018;27:2179-88.
16. Jangland E, Mirza N, Conroy T, et al. Nursing Students' understanding of the Fundamentals of Care: A cross-sectional study in five countries. *J Clin Nurs*2018;27:2460-72.
17. Feo R, Donnelly F, Frensham L, et al. Embedding fundamental care in the pre-registration nursing curriculum: Results from a pilot study. *Nurse Educ Pract*2018;31:20-8.
18. Feo R, Frensham L, Conroy T, et al. "It's just common sense": Preconceptions and myths regarding fundamental care. *Nurse Educ Pract*2019;36:82-4.
19. Huisman G, Feo R, Vermeulen H, et al. Students' perspectives on basic nursing care education. *J Clin Nurs*2018;27:2450-9.
20. Alderman J, Kastelein C, Feo R, et al. Prioritizing the fundamentals of care within pre-licensure nursing curriculum. *Journal of Nursing Education*2018;57.
21. Parr JM, Bell J, Koziol-McLain J. Evaluating fundamentals of care: The development of a unit-level quality measurement and improvement programme. *J Clin Nurs*2018;27:2360-72.
22. Zwakhalen SMG, Hamers JPH, Metzeltin SF, et al. Basic nursing care: The most provided, the least evidence based – A discussion paper. *J Clin Nurs*2018;27:2496-505.
23. Ball J, Ballinger C, De longh A, et al. Determining priorities for research to improve fundamental care on hospital wards. *Research Involvement and Engagement*2016;2:1-17.

# BMJ Open

## Speaking Up for Fundamental Care: A Position Statement from the 2019 International Learning Collaborative (ILC) Meeting, Aalborg, Denmark

|                                 |                                                                                                                                                                                                                                                                                                                                                                                                                                                                                                                                                                                                                                                                                                                                                                                                                                                                                                                                                                                                                                                                                                                                                                                                                                                                                                                                                                                                                                |
|---------------------------------|--------------------------------------------------------------------------------------------------------------------------------------------------------------------------------------------------------------------------------------------------------------------------------------------------------------------------------------------------------------------------------------------------------------------------------------------------------------------------------------------------------------------------------------------------------------------------------------------------------------------------------------------------------------------------------------------------------------------------------------------------------------------------------------------------------------------------------------------------------------------------------------------------------------------------------------------------------------------------------------------------------------------------------------------------------------------------------------------------------------------------------------------------------------------------------------------------------------------------------------------------------------------------------------------------------------------------------------------------------------------------------------------------------------------------------|
| Journal:                        | <i>BMJ Open</i>                                                                                                                                                                                                                                                                                                                                                                                                                                                                                                                                                                                                                                                                                                                                                                                                                                                                                                                                                                                                                                                                                                                                                                                                                                                                                                                                                                                                                |
| Manuscript ID                   | bmjopen-2019-033077.R2                                                                                                                                                                                                                                                                                                                                                                                                                                                                                                                                                                                                                                                                                                                                                                                                                                                                                                                                                                                                                                                                                                                                                                                                                                                                                                                                                                                                         |
| Article Type:                   | Communication                                                                                                                                                                                                                                                                                                                                                                                                                                                                                                                                                                                                                                                                                                                                                                                                                                                                                                                                                                                                                                                                                                                                                                                                                                                                                                                                                                                                                  |
| Date Submitted by the Author:   | 15-Oct-2019                                                                                                                                                                                                                                                                                                                                                                                                                                                                                                                                                                                                                                                                                                                                                                                                                                                                                                                                                                                                                                                                                                                                                                                                                                                                                                                                                                                                                    |
| Complete List of Authors:       | <p>Kitson, Alison; Flinders University, College of Nursing and Health Sciences<br/> Carr, Devin; Michigan Medicine, University Hospital and Frankel Cardiovascular Center<br/> Conroy, Tiffany ; Flinders University, College of Nursing and Health Sciences<br/> Feo, Rebecca; Flinders University, College of Nursing and Health Sciences<br/> Grønkjær, Mette; Aalborg University, Department of Clinical Medicine; Aalborg University Hospital, Clinical Nursing Research Unit<br/> Huisman-de Waal, Getty; Radboud Universiteit<br/> Jackson, Debra; University of Technology Sydney<br/> Jeffs, Lianne; Sinai Health System, Lunenfeld-Tananbaum Research Institute; University of Toronto, Lawrence S. Bloomberg Faculty of Nursing<br/> Merkley, Jane; Sinai Health System; University of Toronto, Lawrence S. Bloomberg Faculty of Nursing<br/> Muntlin Athlin, Åsa; Uppsala University, Department of Medical Sciences; Uppsala University Hospital, Department of Emergency Care and Internal Medicine<br/> Parr, Jennifer; Counties Manukau District Health Board<br/> Richards, David; University of Exeter, Medical School<br/> Sørensen, Erik; Aalborg University Hospital, Clinical Nursing Research Unit; Aalborg University, Department of Clinical Medicine<br/> Wengström, Yvonne; Karolinska Institutet, Neurobiology Care Science and Society, Nursing; Karolinska University Hospital, Theme Cancer</p> |
| <b>Primary Subject Heading</b>: | Nursing                                                                                                                                                                                                                                                                                                                                                                                                                                                                                                                                                                                                                                                                                                                                                                                                                                                                                                                                                                                                                                                                                                                                                                                                                                                                                                                                                                                                                        |
| Secondary Subject Heading:      | Nursing                                                                                                                                                                                                                                                                                                                                                                                                                                                                                                                                                                                                                                                                                                                                                                                                                                                                                                                                                                                                                                                                                                                                                                                                                                                                                                                                                                                                                        |
| Keywords:                       | Health & safety < HEALTH SERVICES ADMINISTRATION & MANAGEMENT, Quality in health care < HEALTH SERVICES ADMINISTRATION & MANAGEMENT, HEALTH SERVICES ADMINISTRATION & MANAGEMENT                                                                                                                                                                                                                                                                                                                                                                                                                                                                                                                                                                                                                                                                                                                                                                                                                                                                                                                                                                                                                                                                                                                                                                                                                                               |
|                                 |                                                                                                                                                                                                                                                                                                                                                                                                                                                                                                                                                                                                                                                                                                                                                                                                                                                                                                                                                                                                                                                                                                                                                                                                                                                                                                                                                                                                                                |

1  
2  
3  
4  
5  
6  
7  
8  
9  
10  
11  
12  
13  
14  
15  
16  
17  
18  
19  
20  
21  
22  
23  
24  
25  
26  
27  
28  
29  
30  
31  
32  
33  
34  
35  
36  
37  
38  
39  
40  
41  
42  
43  
44  
45  
46  
47  
48  
49  
50  
51  
52  
53  
54  
55  
56  
57  
58  
59  
60

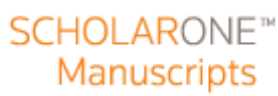

1  
2  
3 **Title page**  
4  
5  
6  
7

8 **Title:** Speaking Up for Fundamental Care: A Position Statement from the 2019 International Learning  
9  
10 Collaborative (ILC) Meeting, Aalborg, Denmark  
11  
12  
13

14 **Authors**  
15

16 Alison Kitson  
17

18 College of Nursing and Health Sciences, Flinders University, Adelaide, Australia  
19  
20  
21  
22

23 Devin Carr  
24

25 University Hospital and Frankel Cardiovascular Center, Michigan Medicine, Ann Arbor, US  
26  
27  
28  
29

30 Tiffany Conroy  
31

32 College of Nursing and Health Sciences, Flinders University, Adelaide, Australia  
33  
34  
35  
36

37 Rebecca Feo  
38

39 College of Nursing and Health Sciences, Flinders University, Adelaide, Australia  
40  
41  
42  
43

44 Mette Grønkjær  
45

46 Department of Clinical Medicine, Aalborg University and Clinical Nursing Research Unit, Aalborg  
47  
48  
49

50 University Hospital, Aalborg, Denmark  
51  
52

53 Getty Huisman-de Waal  
54

55 Radboud University Medical Center, Radboud Institute for Health Sciences, IQ Healthcare, Nijmegen,  
56  
57

58 The Netherlands  
59  
60

1  
2  
3 Debra Jackson

4  
5 Faculty of Health, University of Technology Sydney, Sydney, Australia  
6  
7  
8

9  
10 Lianne Jeffs

11  
12 Lunenfeld-Tananbaum Research Institute, Sinai Health System, Toronto, Canada  
13  
14  
15

16 Jane Merkley

17  
18 Lunenfeld-Tananbaum Research Institute, Sinai Health System, Toronto, Canada  
19  
20  
21

22  
23 Åsa Muntlin Athlin

24  
25 Department of Emergency Care and Internal Medicine, Uppsala University Hospital, and Department  
26  
27 of Medical Sciences, Uppsala University, Uppsala, Sweden; College of Nursing and Health Sciences,  
28  
29 Flinders University, Adelaide, Australia  
30  
31  
32

33  
34 Jenny Parr

35  
36 Counties Manukau District Health Board, Auckland, New Zealand  
37  
38  
39  
40

41 David A Richards

42  
43 College of Medicine and Health, University of Exeter, Exeter, UK  
44  
45  
46  
47

48 Erik Elgaard Sørensen

49  
50 Department of Clinical Medicine, Aalborg University and Clinical Nursing Research Unit, Aalborg  
51  
52 University Hospital, Aalborg, Denmark  
53  
54  
55

56  
57 Yvonne Wengström  
58  
59  
60

1  
2  
3 Division of Neurobiology Care Science and Society, Nursing, Karolinska Institutet and Theme Cancer,  
4  
5 Karolinska University Hospital, Stockholm, Sweden  
6  
7  
8  
9

10 **Corresponding author**

11  
12 Name: Alison Kitson

13  
14 Postal address: GPO Box 2100, Adelaide 5001, South Australia

15  
16 Email: [alison.kitson@flinders.edu.au](mailto:alison.kitson@flinders.edu.au)

17  
18 Telephone: +61 8 82013492  
19  
20  
21  
22  
23  
24  
25

26 **Keywords:** nursing care, health care quality, patient care  
27  
28  
29  
30  
31

32 **Word count (excluding title page, abstract and references):** 2822  
33  
34  
35  
36  
37  
38  
39  
40  
41  
42  
43  
44  
45  
46  
47  
48  
49  
50  
51  
52  
53  
54  
55  
56  
57  
58  
59  
60



## Abstract

**Objective.** The International Learning Collaborative (ILC) is an organization dedicated to understanding why fundamental care, the care required by all patients regardless of clinical condition, fails to be provided in healthcare systems globally. At its 11th annual meeting in 2019, nursing leaders from 11 countries, together with patient representatives, confirmed that patients' fundamental care needs are still being ignored and nurses are still afraid to 'speak up' when these care failures occur. Whilst the ILC's efforts over the past decade have led to increased recognition of the importance of fundamental care, it is not enough. To generate practical, sustainable solutions, we need to substantially rethink fundamental care and its contribution to patient outcomes and experiences, staff wellbeing, safety and quality, and the economic viability of healthcare systems.

**Key arguments.** We present five propositions for radically transforming fundamental care delivery:

1. Value: Fundamental care must be foundational to all caring activities, systems and institutions
2. Talk: Fundamental care must be explicitly articulated in all caring activities, systems and institutions
3. Do: Fundamental care must be explicitly actioned and evaluated in all caring activities, systems and institutions
4. Own: Fundamental care must be owned by each individual who delivers care, works in a system that is responsible for care or works in an institution whose mission is to deliver care
5. Research: Fundamental care must undergo systematic and high-quality investigations to generate the evidence needed to inform care practices and shape health systems and education curricula

**Conclusion.** For radical transformation within health systems globally, we must move beyond nursing and ensure all members of the healthcare team – educators, students, consumers, clinicians,

1  
2  
3 leaders, researchers, policy-makers, and politicians – value, talk, do, own and research fundamental  
4  
5 care. It is only through coordinated, collaborative effort that we will, and must, achieve real change.  
6  
7  
8  
9  
10  
11  
12  
13  
14  
15  
16  
17  
18  
19  
20  
21  
22  
23  
24  
25  
26  
27  
28  
29  
30  
31  
32  
33  
34  
35  
36  
37  
38  
39  
40  
41  
42  
43  
44  
45  
46  
47  
48  
49  
50  
51  
52  
53  
54  
55  
56  
57  
58  
59  
60

For peer review only

### **THE 'WICKED PROBLEM'**

One would think, with all the resources health systems continue to put into safety and quality initiatives; the implementation of more person-centred care policies; and the proliferation of agencies to regulate and demand better fundamental care for patients (e.g., Care Quality Commission in the UK, US Agency for Healthcare Research and Quality, and Australian Commission on Safety and Quality in Health Care), that the tide would be turning. However, this does not seem to be the case, as illustrated by recent reports of continued poor practices.<sup>[1]</sup> A nurse turning away from a patient in a single episode of suffering is worrying in itself. However; when this action becomes the norm, when it is tolerated and even normalised within teams and institutions, it is necessary to reflect critically on why patients are treated in such dehumanising ways,<sup>[2]</sup> and what can be done to ensure patients receive safe, dignified care for their fundamental needs.

The International Learning Collaborative (ILC) is an organisation set up to understand why fundamental care fails to be provided in our healthcare systems. At its 11<sup>th</sup> annual meeting in 2019, hosted by Aalborg University and Aalborg University Hospital in Denmark, nursing leaders from 11 countries, together with patient representatives, confirmed that fundamental care is still failing to be delivered consistently. Patients are still being ignored and 'commodified' and nurses are still afraid of 'speaking up' when fundamental care failures happen.

Personal experiences from nursing colleagues and patients outlining fundamental care breaches were all too readily available. One nurse recounted her story of being in an Emergency Department caring for a patient who needed a CT scan. The patient had to be moved to the X-ray department and then to a ward. Before this happened, the patient was incontinent of urine, soaking the bed and himself. The nurse went to find clean linen and pyjamas but was told by the nurse-in-charge that there was no time to do this as the department would fail its 4-hour discharge target if there was a delay. The nurse ignored the instruction from the nurse-in-charge, instead meeting the patient's

1  
2  
3 fundamental care needs, but was made to feel she had done something wrong. Another nurse told  
4 the story of her father-in-law who lost several kilos in weight over the course of a 10-day hospital  
5 stay. He was discharged frail, weak and vulnerable, with no guidance or support offered to the  
6 patient and family. Even as a nurse, she felt unable to challenge what was happening to him.  
7  
8  
9

10  
11  
12  
13  
14 Patient representatives at the meeting confirmed that these types of dehumanising actions were  
15 familiar to them. One cancer survivor spoke about having survived but was traumatised by the  
16 experience of care. Another survivor recounted a conversation with a nurse who said to the patient,  
17 when about to start chemotherapy, that if it had been her, she would not have agreed to the  
18 treatment. These stories resonated with nursing leaders attending the ILC meeting from Australia,  
19 New Zealand, Japan, Iceland, Norway, Sweden, Denmark, the Netherlands, Canada, the US, and the  
20 UK. These stories are also strongly supported by existing empirical evidence, spanning more than a  
21 decade of research, regarding patients' views and experiences of care across a range of healthcare  
22 settings and systems.<sup>[3, 4]</sup> This research demonstrates the central importance that patients place on  
23 their relationships with care providers, and the need for nurses to display not only technical  
24 competence in relation to physical aspects of healthcare but also relational competence, where  
25 patients' psychosocial needs are integrated and addressed in every episode of care.<sup>[5-12]</sup>  
26  
27  
28  
29  
30  
31  
32  
33  
34  
35  
36  
37  
38  
39  
40  
41  
42  
43

44 This existing evidence – both empirical and anecdotal – would seem to indicate that we continue to  
45 have a problem; not an isolated one, but one that has infected every health system globally. It would  
46 also seem that we cannot solve it by doing more of the same. We need to rethink fundamental care  
47 and its contribution to patient and staff wellbeing, patient safety and quality, and the economic  
48 viability of our healthcare systems.  
49  
50  
51  
52  
53

#### 54 55 56 **THE PROPOSED SOLUTION...** 57 58 59 60

1  
2  
3 In addition to trying to understand the reasons for the fundamental care failures in our healthcare  
4 systems, at the 2019 ILC meeting we worked on finding different ways of addressing the issue,  
5  
6 moving to practical and sustainable solutions. We identified five essential ingredients needed for  
7  
8 this transformation. These are presented as five propositions:  
9  
10

- 11 1. Value Fundamental Care: Fundamental care must be foundational to all caring activities,  
12 systems and institutions  
13
- 14 2. Talk Fundamental Care: Fundamental care must be explicitly articulated in all caring  
15 activities, systems and institutions  
16
- 17 3. Do Fundamental Care: Fundamental care must be explicitly actioned and evaluated in all  
18 caring activities, systems and institutions  
19
- 20 4. Own Fundamental Care: Fundamental care must be owned by each individual who delivers  
21 care, who works in a system that is responsible for care or who works in an institution whose  
22 mission is to deliver care  
23
- 24 5. Research Fundamental Care: Fundamental care must undergo systematic, high-quality  
25 investigations to generate the evidence needed to inform care practices and shape health  
26 systems and education curricula  
27

### 28 29 30 31 32 33 34 35 36 37 38 39 40 41 **1. Value Fundamental Care**

42 The ILC has been systematically developing definitions around fundamental care<sup>[13]</sup> and has  
43 developed an evidence-based framework<sup>[14, 15]</sup> to help nurses implement fundamental care in a more  
44 consistent way. The Fundamentals of Care Framework consists of three core dimensions. These are:  
45  
46 1) the development of a positive, trusting relationship between the nurse (or other care provider)  
47 and patient; 2) integrating and attending to, in every episode of care, a patient's physical (e.g.,  
48 nutrition), psychosocial (e.g., dignity) and relational needs (e.g., empathy); and 3) being cognizant of  
49 how the context in which care takes place can facilitate or hinder the accomplishment of the first  
50 two activities, working to mitigate or enhance these impacts where possible.<sup>[15]</sup>  
51  
52  
53  
54  
55  
56  
57  
58  
59  
60

1  
2  
3  
4  
5 Our argument is that regardless of clinical condition, age, acuity, complexity, or care setting, every  
6 patient will require their fundamental care needs to be assessed and met for them to be safe and to  
7 recover optimally. Current failures in our health systems, including the poor level of remuneration  
8 for nurses delivering fundamental care, are directly related to the lack of value placed on  
9 fundamental care as a foundational cornerstone to safety and quality.  
10  
11  
12  
13  
14  
15  
16  
17

18  
19 Our proposal is that if executive boards and shareholders in caring and healthcare businesses  
20 recognised and acknowledged the importance of fundamental care to their financial success, then  
21 appropriate systems and processes would be put in place, and would be more effective and efficient,  
22 leading to improved patient outcomes and better staff satisfaction.  
23  
24  
25  
26  
27  
28  
29

## 30 **2. Talk Fundamental Care**

31  
32 Only after executive leaders and shareholders understand the value of delivering fundamental care  
33 consistently to all patients (customers) will the language of fundamental care be more readily  
34 accepted and understood. Commonly, nursing care patient notes are regarded as 'fluffy notes',  
35 rarely referred to by other members of the healthcare team.<sup>[16]</sup> The 'knowledge hierarchy' cascades  
36 from the medical to allied health notes and finally to nursing notes (where some aspects of patients'  
37 fundamental care needs are recorded). Consequently, nursing activities tend to relate to risk  
38 assessments, safety reports or concerns over clinical/medical activity.  
39  
40  
41  
42  
43  
44  
45  
46  
47  
48  
49

50 This reality carries with it profound risks to both patients and nurses. When nothing or very little  
51 about fundamental care is documented in patients' records, it is impossible to tell what has been  
52 provided and what has not. Electronic patient records do not solve this problem as they have been  
53 constructed within the medical hierarchy, hence fundamental care is still invisible.  
54  
55  
56  
57  
58  
59  
60

1  
2  
3 Our argument is that by using the core dimensions of the Fundamentals of Care Framework  
4 (relationship, integration of care and context), we can generate consistent and meaningful  
5 summaries of patients' fundamental care needs. By investing in infrastructure and workflow systems  
6 that comprehensively record these needs, we will be able to document what interventions were  
7 undertaken and what impact they had. Then we will be able to teach fundamental care more  
8 consistently, addressing the ever-present 'theory-practice' gap.<sup>[17]</sup>

9  
10  
11  
12  
13  
14  
15  
16  
17  
18  
19 Our proposal is to extend the complex mapping work needed to generate consistent terminology  
20 around fundamental care and how it is documented, and to invite interdisciplinary colleagues,  
21 managers and educators to engage in this dialogue.

### 22 23 24 25 26 27 **3. Do Fundamental Care**

28  
29 Having fundamental care valued by organisations and having done the work around conceptual  
30 frameworks, terminology and education, we then need to commit to making fundamental care  
31 happen in a consistent, safe, person-centred way for all patients, independent of care setting. This  
32 will require a significant shift in culture for many nurses (and every other member of the care team).  
33 Traditionally, nurses have been rewarded for the speed with which they can accomplish multiple  
34 tasks within rigid timeframes. This 'task and time' mentality is the antithesis to the values of  
35 fundamental care delivery based on relationship and integration of care.<sup>[15]</sup> How whole nursing  
36 teams (and consequently interdisciplinary care teams) must re-design their fundamental care  
37 delivery systems will be a huge transformational activity. It will require re-design teams to work  
38 collaboratively with nurses, patients, and other key stakeholders to turn fundamental caring systems  
39 and processes 'up-side-down.' It will also require the development of standardised ways of  
40 measuring fundamental care that are embedded in patient records and can inform risk assessments  
41 and safety, quality and outcome metrics.<sup>[18]</sup>

1  
2  
3 Our argument is that because the ‘task and time’ culture is so deeply embedded in nursing and  
4 healthcare, there needs to be a paradigm shift in work processes related to fundamental care  
5 delivery. We must move from a ‘task and time’ mentality to a ‘thinking and linking’ mental model,  
6 where nurses are able to integrate and coordinate patients’ fundamental and other care needs  
7 across their healthcare experience.<sup>[19]</sup> To be effective, this shift must occur at all levels of healthcare  
8 systems: the micro level (e.g., in nurses’ attitudes, behaviours and everyday interactions with  
9 patients), meso level (e.g., in the culture and policy of a single organization, including at a unit/ward  
10 level) and macro level (e.g., in national health policies and nursing accreditation standards for clinical  
11 practice and education). This shift is crucial if healthcare systems worldwide are to achieve the goal  
12 of person-centred care, which is at risk of becoming merely rhetoric. Delivering high-quality  
13 fundamental care is a key prerequisite for working with patients in a person-centred way. If we are  
14 to move beyond mere rhetoric, healthcare professionals must have the tools to achieve person-  
15 centred fundamental care in practice and to move their care delivery from a series of tasks to a  
16 coordinated, integrated, relationship-centred healthcare encounter.

17  
18  
19 Our proposal is to call for collaborating healthcare organisations and universities to work with the  
20 ILC to systematically and rigorously undertake this transformation, generating evidence of impact  
21 through cultural change and the development of appropriate measures as we work together to  
22 improve patients’ fundamental care experiences.

#### 4. Own Fundamental Care

23  
24  
25 We must ask ourselves what would healthcare organisations look like if we put fundamental care at  
26 the centre of all that we do. Certainly, there are flagship institutions where patients are satisfied  
27 with their care, where nurses feel happy and fulfilled in their caring roles and where medical and  
28 quality-of-life outcomes are exemplary. However, these are the exception rather than the rule and  
29 we need urgently to own the agenda to make fundamental care more visible in our health systems.



1  
2  
3 There are many practical things we can do such as ensuring fundamental care stories (good and bad)  
4 are presented to executive board members and to local and national politicians; having fundamental  
5 care explicitly embedded in policies, safety and quality standards, educational standards and  
6 research tenders; and making sure that nursing leaders globally speak up for fundamental care.  
7  
8  
9  
10  
11  
12  
13

14 Yet, we know that in many countries, nursing is facing severe shortages due to issues such as poor  
15 recruitment into the profession and poor retention during nursing education and early career  
16 employment; an ageing population, which is creating greater demand for health services; an ageing  
17 nursing workforce; and strategic understaffing of registered nurses within healthcare systems in a  
18 bid to reduce healthcare costs.<sup>[20-22]</sup> Perhaps most worrying, the shortage is also underpinned by  
19 many nurses' decision to leave the profession, citing burnout, stress, understaffing, high workloads,  
20 minimal job satisfaction, emotional exhaustion, and poor patient safety as reasons.<sup>[23-28]</sup> Many  
21 nurses talk about the disappointment and disillusionment of wanting to care for patients in an  
22 holistic way but being unable to do this in the systems in which they work.<sup>[29]</sup> Increasingly, and  
23 perhaps unsurprisingly, international research is identifying that what many nurses prioritise is  
24 technical care over fundamental care,<sup>[30]</sup> which leads to missed care<sup>[30, 31]</sup> or, worst case scenario,  
25 patient neglect or harm.<sup>[32-34]</sup>  
26  
27  
28  
29  
30  
31  
32  
33  
34  
35  
36  
37  
38  
39  
40  
41  
42  
43

44 However, workforce shortages cannot be an excuse for failure to address fundamental care needs.  
45 Neither can the mantra of busyness. Fundamental care is core to nursing values and nursing work.  
46 Nurses should not be 'too busy' to deliver it. Devaluing fundamental care and its importance  
47 devalues nursing and its importance. The notion that core nursing work can be performed by cadres  
48 of lower-educated care assistants is only burying the problem. This might solve a workforce shortage  
49 but it will increase the risk of harm to our patients. Our recent ILC meeting reflected the concern  
50 that patients also have with these issues. As stated by one of the patient representatives at the  
51  
52  
53  
54  
55  
56  
57  
58  
59  
60

1  
2  
3 meeting: more nurses are not the only answer – there needs to be a total redesign of how  
4  
5 fundamental care is valued in the system.<sup>[see also 1]</sup>  
6  
7  
8  
9

## 10 **5. Research Fundamental Care**

11  
12 Recent reports have identified poor fundamental care practices with care being standardised and  
13  
14 patients being objectified (see Journal of Clinical Nursing Special Issue on *Fundamental Care: The*  
15  
16 *Last Evidence-free Zone*, 2018, <https://onlinelibrary.wiley.com/toc/13652702/2018/27/11-12>).  
17

18  
19 Fundamental care tends to be devalued, and the delivery of safe, person-centred care is  
20  
21 challenged.<sup>[35]</sup> Although studies have stressed that nursing care is important for patient safety,  
22  
23 recovery and positive patient experiences,<sup>[36, 37]</sup> there is a pressing need to generate studies that  
24  
25 demonstrate the benefits of fundamental care in order to strengthen the evidence base. For  
26  
27 example, in a recent systematic review,<sup>[38]</sup> the authors note in their quality appraisal of 149  
28  
29 experimental studies into nursing care for the fundamentals of nutrition, hygiene, toileting and  
30  
31 mobility, that all but 13 studies had significant biases and only one had clear practice implications for  
32  
33 delivering fundamental care in routine nursing care environments.  
34  
35  
36  
37  
38

39  
40 We also need systematically to evaluate the re-design of care delivery systems that put the patient  
41  
42 and their fundamental care needs at the centre. We need sound economic evaluation of the  
43  
44 investment required and off set that with improvements in health outcomes, throughput, and safety  
45  
46 and quality indicators. We need to research how we teach fundamental care to nursing students<sup>[39-</sup>  
47  
48 <sup>43]</sup> and we need to understand how fundamental care is embedded in policies and legislation at  
49  
50 national and local levels.<sup>[44]</sup>  
51  
52  
53

54  
55 Our argument is that the current problems healthcare systems are facing could be solved by more  
56  
57 investment in research programs that investigate how to deliver high-quality fundamental care in  
58  
59 multiple contexts and how to embed this evidence into nursing (and other) healthcare curricula.  
60

1  
2  
3 There are some exemplars of this, including the Basic Care Revisited research program in the  
4  
5 Netherlands,<sup>[45]</sup> the fundamental care theme of the National Institute for Health Research  
6  
7 Collaboration for Leadership in Applied Health Research and Care Wessex,<sup>[46]</sup> and the pioneering work  
8  
9 of ILC members (see Journal of Clinical Nursing Special Issue), but this work needs to be scaled up  
10  
11 and coordinated in a way that will start to offer solutions to healthcare systems sooner rather than  
12  
13 later. We must stop wasting tax payers' money in every country by thinking fundamental care  
14  
15 failures can be fixed by (at best) naive or (at worst) knee-jerk policy initiatives that do not address  
16  
17 the underlying problems.  
18  
19

20  
21  
22  
23 Our proposal is to work with national governments, healthcare organisations, research funding  
24  
25 bodies, universities, and national and international nursing associations, to generate a collaborative  
26  
27 research and implementation program on fundamental care.  
28  
29

### 30 31 32 **THE CALL TO ACTION**

33  
34 We need to recognise the profoundly complex nature of the challenge facing all healthcare systems  
35  
36 globally. We need to acknowledge that how we are trying to fix the problem is not working and we  
37  
38 need to think differently. We need a call to action that connects the valuing, talking, doing, owning  
39  
40 and researching of fundamental care.  
41  
42  
43

44  
45 Whilst the ILC has grown in recent years, now totalling more than 240 members from 22 countries,  
46  
47 and making significant inroads, it is clear we cannot do it alone. And whilst other commentators  
48  
49 have identified the need for action around 'reconciliation, refocus and research'<sup>[1, p.151]</sup> on  
50  
51 fundamental care, we need a more concerted, explicit approach.  
52  
53

54  
55  
56 For the Call to Action to work we must move beyond nursing and involve all members of the  
57  
58 healthcare team: educators; students; consumers; clinicians; executives, managers and leaders;  
59  
60

1  
2  
3 researchers; policy-makers; the general public and politicians. We must all work together to initiate  
4  
5 and sustain real change and must do so in a coordinated, collaborative way.  
6  
7

8  
9  
10 Our proposal therefore is precisely the Call to Action for Fundamental Care.  
11  
12

13  
14 If you want to Value, Talk, Do, Own and Research Fundamental Care, please contact us at

15  
16 [intlearningcollaborative@gmail.com](mailto:intlearningcollaborative@gmail.com) or <https://intlearningcollab.org/>  
17  
18

### 19 20 21 **Contributorship statement**

22  
23 AK, DC, TC, RF, MG, GH, DJ, JP, ES and YW all made substantial contributions to the conception and  
24  
25 design of the manuscript and its central argument during the ILC 2019 meeting.  
26

27  
28 AK drafted the initial manuscript.  
29

30  
31 AK, DC, RF, MG, GH, DJ, LJ, JM, AMA, DR, ES and YW all contributed to drafting of the manuscript and  
32  
33 critical revision of its intellectual content.  
34

35  
36 AK, DC, TC, RF, MG, GH, DJ, LJ, JM, AMA, JP, DR, ES and YW all approved the manuscript for  
37  
38 publication and agreed to be accountable for all aspects of the work, including ensuring that  
39  
40 questions related to the accuracy or integrity of any part of the work are appropriately investigated  
41  
42 and resolved.  
43  
44

### 45 46 **Competing interests**

47  
48 None declared  
49  
50

### 51 52 **Funding**

53  
54 The authors have not declared a specific grant for this research from any funding agency in the  
55  
56 public, commercial or not-for-profit sectors.  
57  
58  
59  
60

1  
2  
3 **Acknowledgements**  
4

5 The authors would like to thank the patient representatives at ILC 2019 – Morten Klessen and  
6  
7 Birgitte Schouw Pedersen – for sharing their experiences.  
8  
9  
10  
11  
12  
13  
14  
15  
16  
17  
18  
19  
20  
21  
22  
23  
24  
25  
26  
27  
28  
29  
30  
31  
32  
33  
34  
35  
36  
37  
38  
39  
40  
41  
42  
43  
44  
45  
46  
47  
48  
49  
50  
51  
52  
53  
54  
55  
56  
57  
58  
59  
60

For peer review only

## References

1. Richards DA, Borglin G. 'Shitty nursing' – The new normal? *Int J Nurs Stud*2019;91:148-52.
2. Hutchinson M, Jackson D. Troubling fragments and small stories: An analysis of public commentary on nursing through a web blog. *Collegian*2014;21:81-8.
3. Jangland E, Kitson A, Muntlin Athlin Å. Patients with acute abdominal pain describe their experiences of fundamental care across the acute care episode: A multi-stage qualitative case study. *J Adv Nurs*2016;72:791-801.
4. Blakey E, Jackson D, Walthall H, et al. What is the experience of being readmitted to hospital for people 65 years and over? A review of the literature. *Contemp Nurse*2017;53:698-712.
5. Feo R, Donnelly F, Muntlin Athlin A, et al. Providing high-quality fundamental care for patients with acute abdominal pain: A qualitative study of patients' experiences in acute care. *J Health Organ Manag*2019;33:110-23.
6. Corbin J. Is caring a lost art in nursing? *Int J Nurs Stud*2008;45:163-5.
7. Bridges J, Flatley M, Meyer J. Older people's and relatives' experiences in acute care settings: Systematic review and synthesis of qualitative studies. *Int J Nurs Stud*2010;47:89-107.
8. Kitson A, Dow C, Calabrese JD, et al. Stroke survivors' experiences of the fundamentals of care: A qualitative analysis. *Int J Nurs Stud*2013;50:392-403.
9. Kuluski K, Hoang SN, Schaink AK, et al. The care delivery experience of hospitalized patients with complex chronic disease. *Health Expectations*2013;16:e111-e23.
10. Robert G, Cornwell J, Brearly S, et al. 2011. What matters to patients? Developing the evidence base for measuring and improving patient experience. . Coventry, UK: University of Warwick.

11. Sharp S, McAllister M, Broadbent M. The vital blend of clinical competence and compassion: How patients experience person-centred care. *Contemp Nurse*2016;52:300-12.
12. Muntlin Athlin Å, Brovall M, Wengström Y, et al. Descriptions of Fundamental Care needs in cancer care – An exploratory study. *J Clin Nurs*2018;27:2322-32.
13. Feo R, Conroy T, Jangland E, et al. Towards a standardised definition for fundamental care: A modified Delphi study. *J Clin Nurs*2018;27:2285-99.
14. Feo R, Conroy T, Alderman J, et al. Implementing fundamental care in clinical practice. *Nurs Stand*2017;31:52-62.
15. Kitson A, Conroy T, Kuluski K, et al. 2013. Reclaiming and redefining the Fundamentals of Care: Nursing's response to meeting patients' basic human needs. Adelaide, South Australia: School of Nursing, The University of Adelaide.
16. Hripcsak G, Vawdrey DK, Fred MR, et al. Use of electronic clinical documentation: Time spent and team interactions. *Journal of the American Medical Informatics Association*2011;18:112-7.
17. MacMillan K. The hidden curriculum: What are we actually teaching about the fundamentals of care? *Can J Nurs Leadersh*2016;26:37-46.
18. Jeffs L, Muntlin Athlin A, Needleman J, et al. Building the foundation to generate a fundamental care standardised data set. *J Clin Nurs*2018;27:2481-8.
19. Kitson A, Muntlin Athlin Å, Conroy T. Anything but Basic: Nursing's Challenge in Meeting Patients' Fundamental Care Needs. *J Nurs Scholarsh*2014;46:331-9.
20. Buchan J, Duffield C, Jordan A. 'Solving' nursing shortages: Do we need a New Agenda? *J Nurs Manage*2015;23:543-5.

- 1  
2  
3 21. Flinkman M, Salanterä S. Early career experiences and perceptions - a qualitative  
4  
5 exploration of the turnover of young registered nurses and intention to leave the nursing  
6  
7 profession in Finland. *J Nurs Manage*2015;23:1050-7.
- 8  
9  
10 22. Health Workforce Australia. 2012. Health workforce 2025. Doctors, nurses and  
11  
12 midwives. Vol. 1. Canberra: Australian Government.
- 13  
14  
15 23. Sasso L, Bagnasco A, Catania G, et al. Push and pull factors of nurses' intention to leave. *J*  
16  
17 *Nurs Manage*2019;27:946-54.
- 18  
19  
20 24. Heinen MM, van Achterberg T, Schwendimann R, et al. Nurses' intention to leave their  
21  
22 profession: A cross sectional observational study in 10 European countries. *Int J Nurs*  
23  
24 *Stud*2013;50:174-84.
- 25  
26  
27 25. Jiang H, Ma L, Gao C, et al. Satisfaction, burnout and intention to stay of emergency  
28  
29 nurses in Shanghai. *Emerg Med J*2017;34:448-53.
- 30  
31  
32 26. Lee YW, Dai YT, McCreary LL. Quality of work life as a predictor of nurses' intention to  
33  
34 leave units, organisations and the profession. *J Nurs Manage*2015;23:521-31.
- 35  
36  
37 27. Leone C, Bruyneel L, Anderson JE, et al. Work environment issues and intention-to-leave  
38  
39 in Portuguese nurses: A cross-sectional study. *Health Policy*2015;119:1584-92.
- 40  
41  
42 28. Halter M, Boiko O, Pelone F, et al. The determinants and consequences of adult nursing  
43  
44 staff turnover: A systematic review of systematic reviews. *BMC Health Serv Res*2017;17.
- 45  
46  
47 29. Eley R, Eley D, Rogers-Clark C. Reasons for entering and leaving nursing: An Australian  
48  
49 regional study. *Australian Journal of Advanced Nursing*2010;28:6-13.
- 50  
51  
52 30. Mandal L, Seethalakshmi A. Experience of prioritizing in nursing care in India: A  
53  
54 qualitative study. *Indian Journal of Public Health Research and Development*2019;10:103-7.
- 55  
56  
57 31. Jones TL, Hamilton P, Murry N. Unfinished nursing care, missed care, and implicitly  
58  
59 rationed care: State of the science review. *Int J Nurs Stud*2015;52:1121-37.
- 60



- 1  
2  
3 32. Gillespie A, Reader TW. Patient-Centered Insights: Using Health Care Complaints to  
4  
5  
6  
7  
8  
9  
10  
11  
12  
13 33. Ball JE, Bruyneel L, Aiken LH, et al. Post-operative mortality, missed care and nurse  
14  
15  
16  
17  
18  
19  
20  
21  
22  
23 34. Ball JE, Murrells T, Rafferty AM, et al. Care left undone during nursing shifts: Associations  
24  
25  
26  
27  
28  
29  
30  
31  
32  
33 35. Feo R, Kitson A. Promoting patient-centred fundamental care in acute healthcare  
34  
35  
36  
37  
38  
39  
40  
41  
42  
43 36. Griffiths P, Maruotti A, Recio Saucedo A, et al. Nurse staffing, nursing assistants and  
44  
45  
46  
47  
48  
49  
50  
51  
52  
53 37. Aiken LH, Sloane D, Griffiths P, et al. Nursing skill mix in European hospitals: Cross-  
54  
55  
56  
57  
58  
59  
60  
61  
62  
63  
64  
65  
66  
67  
68  
69  
70  
71  
72  
73  
74  
75  
76  
77  
78  
79  
80  
81  
82  
83  
84  
85  
86  
87  
88  
89  
90  
91  
92  
93  
94  
95  
96  
97  
98  
99  
100  
101  
102  
103  
104  
105  
106  
107  
108  
109  
110  
111  
112  
113  
114  
115  
116  
117  
118  
119  
120  
121  
122  
123  
124  
125  
126  
127  
128  
129  
130  
131  
132  
133  
134  
135  
136  
137  
138  
139  
140  
141  
142  
143  
144  
145  
146  
147  
148  
149  
150  
151  
152  
153  
154  
155  
156  
157  
158  
159  
160  
161  
162  
163  
164  
165  
166  
167  
168  
169  
170  
171  
172  
173  
174  
175  
176  
177  
178  
179  
180  
181  
182  
183  
184  
185  
186  
187  
188  
189  
190  
191  
192  
193  
194  
195  
196  
197  
198  
199  
200  
201  
202  
203  
204  
205  
206  
207  
208  
209  
210  
211  
212  
213  
214  
215  
216  
217  
218  
219  
220  
221  
222  
223  
224  
225  
226  
227  
228  
229  
230  
231  
232  
233  
234  
235  
236  
237  
238  
239  
240  
241  
242  
243  
244  
245  
246  
247  
248  
249  
250  
251  
252  
253  
254  
255  
256  
257  
258  
259  
260  
261  
262  
263  
264  
265  
266  
267  
268  
269  
270  
271  
272  
273  
274  
275  
276  
277  
278  
279  
280  
281  
282  
283  
284  
285  
286  
287  
288  
289  
290  
291  
292  
293  
294  
295  
296  
297  
298  
299  
300  
301  
302  
303  
304  
305  
306  
307  
308  
309  
310  
311  
312  
313  
314  
315  
316  
317  
318  
319  
320  
321  
322  
323  
324  
325  
326  
327  
328  
329  
330  
331  
332  
333  
334  
335  
336  
337  
338  
339  
340  
341  
342  
343  
344  
345  
346  
347  
348  
349  
350  
351  
352  
353  
354  
355  
356  
357  
358  
359  
360  
361  
362  
363  
364  
365  
366  
367  
368  
369  
370  
371  
372  
373  
374  
375  
376  
377  
378  
379  
380  
381  
382  
383  
384  
385  
386  
387  
388  
389  
390  
391  
392  
393  
394  
395  
396  
397  
398  
399  
400  
401  
402  
403  
404  
405  
406  
407  
408  
409  
410  
411  
412  
413  
414  
415  
416  
417  
418  
419  
420  
421  
422  
423  
424  
425  
426  
427  
428  
429  
430  
431  
432  
433  
434  
435  
436  
437  
438  
439  
440  
441  
442  
443  
444  
445  
446  
447  
448  
449  
450  
451  
452  
453  
454  
455  
456  
457  
458  
459  
460  
461  
462  
463  
464  
465  
466  
467  
468  
469  
470  
471  
472  
473  
474  
475  
476  
477  
478  
479  
480  
481  
482  
483  
484  
485  
486  
487  
488  
489  
490  
491  
492  
493  
494  
495  
496  
497  
498  
499  
500  
501  
502  
503  
504  
505  
506  
507  
508  
509  
510  
511  
512  
513  
514  
515  
516  
517  
518  
519  
520  
521  
522  
523  
524  
525  
526  
527  
528  
529  
530  
531  
532  
533  
534  
535  
536  
537  
538  
539  
540  
541  
542  
543  
544  
545  
546  
547  
548  
549  
550  
551  
552  
553  
554  
555  
556  
557  
558  
559  
560  
561  
562  
563  
564  
565  
566  
567  
568  
569  
570  
571  
572  
573  
574  
575  
576  
577  
578  
579  
580  
581  
582  
583  
584  
585  
586  
587  
588  
589  
590  
591  
592  
593  
594  
595  
596  
597  
598  
599  
600  
601  
602  
603  
604  
605  
606  
607  
608  
609  
610  
611  
612  
613  
614  
615  
616  
617  
618  
619  
620  
621  
622  
623  
624  
625  
626  
627  
628  
629  
630  
631  
632  
633  
634  
635  
636  
637  
638  
639  
640  
641  
642  
643  
644  
645  
646  
647  
648  
649  
650  
651  
652  
653  
654  
655  
656  
657  
658  
659  
660  
661  
662  
663  
664  
665  
666  
667  
668  
669  
670  
671  
672  
673  
674  
675  
676  
677  
678  
679  
680  
681  
682  
683  
684  
685  
686  
687  
688  
689  
690  
691  
692  
693  
694  
695  
696  
697  
698  
699  
700  
701  
702  
703  
704  
705  
706  
707  
708  
709  
710  
711  
712  
713  
714  
715  
716  
717  
718  
719  
720  
721  
722  
723  
724  
725  
726  
727  
728  
729  
730  
731  
732  
733  
734  
735  
736  
737  
738  
739  
740  
741  
742  
743  
744  
745  
746  
747  
748  
749  
750  
751  
752  
753  
754  
755  
756  
757  
758  
759  
760  
761  
762  
763  
764  
765  
766  
767  
768  
769  
770  
771  
772  
773  
774  
775  
776  
777  
778  
779  
780  
781  
782  
783  
784  
785  
786  
787  
788  
789  
790  
791  
792  
793  
794  
795  
796  
797  
798  
799  
800  
801  
802  
803  
804  
805  
806  
807  
808  
809  
810  
811  
812  
813  
814  
815  
816  
817  
818  
819  
820  
821  
822  
823  
824  
825  
826  
827  
828  
829  
830  
831  
832  
833  
834  
835  
836  
837  
838  
839  
840  
841  
842  
843  
844  
845  
846  
847  
848  
849  
850  
851  
852  
853  
854  
855  
856  
857  
858  
859  
860  
861  
862  
863  
864  
865  
866  
867  
868  
869  
870  
871  
872  
873  
874  
875  
876  
877  
878  
879  
880  
881  
882  
883  
884  
885  
886  
887  
888  
889  
890  
891  
892  
893  
894  
895  
896  
897  
898  
899  
900  
901  
902  
903  
904  
905  
906  
907  
908  
909  
910  
911  
912  
913  
914  
915  
916  
917  
918  
919  
920  
921  
922  
923  
924  
925  
926  
927  
928  
929  
930  
931  
932  
933  
934  
935  
936  
937  
938  
939  
940  
941  
942  
943  
944  
945  
946  
947  
948  
949  
950  
951  
952  
953  
954  
955  
956  
957  
958  
959  
960  
961  
962  
963  
964  
965  
966  
967  
968  
969  
970  
971  
972  
973  
974  
975  
976  
977  
978  
979  
980  
981  
982  
983  
984  
985  
986  
987  
988  
989  
990  
991  
992  
993  
994  
995  
996  
997  
998  
999  
1000
32. Gillespie A, Reader TW. Patient-Centered Insights: Using Health Care Complaints to  
Reveal Hot Spots and Blind Spots in Quality and Safety. *Milbank Q*2018;96:530-67.
33. Ball JE, Bruyneel L, Aiken LH, et al. Post-operative mortality, missed care and nurse  
staffing in nine countries: A cross-sectional study. *Int J Nurs Stud*2018;78:10-5.
34. Ball JE, Murrells T, Rafferty AM, et al. Care left undone during nursing shifts: Associations  
with workload and perceived quality of care. *BMJ Qual Saf*2014;23:116-25.
35. Feo R, Kitson A. Promoting patient-centred fundamental care in acute healthcare  
systems: A discussion paper. *Int J Nurs Stud*2016;57:1-11.
36. Griffiths P, Maruotti A, Recio Saucedo A, et al. Nurse staffing, nursing assistants and  
hospital mortality: Retrospective longitudinal cohort study. *BMJ Qual Saf*2018;28:609-17.
37. Aiken LH, Sloane D, Griffiths P, et al. Nursing skill mix in European hospitals: Cross-  
sectional study of the association with mortality, patient ratings, and quality of care. *BMJ  
Qual Saf*2017;26:559-68.
38. Richards DA, Hilli A, Pentecost C, et al. Fundamental nursing care: A systematic review of  
the evidence on the effect of nursing care interventions for nutrition, elimination, mobility  
and hygiene. *J Clin Nurs*2018;27:2179-88.
39. Jangland E, Mirza N, Conroy T, et al. Nursing Students' understanding of the  
Fundamentals of Care: A cross-sectional study in five countries. *J Clin Nurs*2018;27:2460-72.
40. Feo R, Donnelly F, Frensham L, et al. Embedding fundamental care in the pre-registration  
nursing curriculum: Results from a pilot study. *Nurse Educ Pract*2018;31:20-8.
41. Feo R, Frensham L, Conroy T, et al. "It's just common sense": Preconceptions and myths  
regarding fundamental care. *Nurse Educ Pract*2019;36:82-4.
42. Huisman G, Feo R, Vermeulen H, et al. Students' perspectives on basic nursing care  
education. *J Clin Nurs*2018;27:2450-9.

- 1  
2  
3 43. Alderman J, Kastelein C, Feo R, et al. Prioritizing the fundamentals of care within pre-  
4 licensure nursing curriculum. *Journal of Nursing Education*2018;57.  
5  
6  
7  
8 44. Parr JM, Bell J, Koziol-McLain J. Evaluating fundamentals of care: The development of a  
9 unit-level quality measurement and improvement programme. *J Clin Nurs*2018;27:2360-72.  
10  
11  
12  
13 45. Zwakhalen SMG, Hamers JPH, Metzeltin SF, et al. Basic nursing care: The most  
14 provided, the least evidence based – A discussion paper. *J Clin Nurs*2018;27:2496-505.  
15  
16  
17  
18 46. Ball J, Ballinger C, De longh A, et al. Determining priorities for research to improve  
19 fundamental care on hospital wards. *Research Involvement and Engagement*2016;2:1-17.  
20  
21  
22  
23  
24  
25  
26  
27  
28  
29  
30  
31  
32  
33  
34  
35  
36  
37  
38  
39  
40  
41  
42  
43  
44  
45  
46  
47  
48  
49  
50  
51  
52  
53  
54  
55  
56  
57  
58  
59  
60
